# Supplementary material for: In situ synergistic crystallization-induced synthesis of novel Au nanostar-encrusted ZnO mesocrystals with high-quality heterojunctions for high-performance gas sensors
Source: Royal Society of Chemistry journal article supplement (doi:10.1039/c5ta02182k), 2015-01-01
Supplement: c5ta02182k1.pdf [file c5ta02182k1.pdf]

## Supporting information

### In-situ synergistic crystallization-induced synthesis of novel Au nanostar-encrusted ZnO mesocrystals with high-quality heterojunctions for high-performance gas sensors

Lianhai Zu, Yao Qin, Jinhua Yang\*

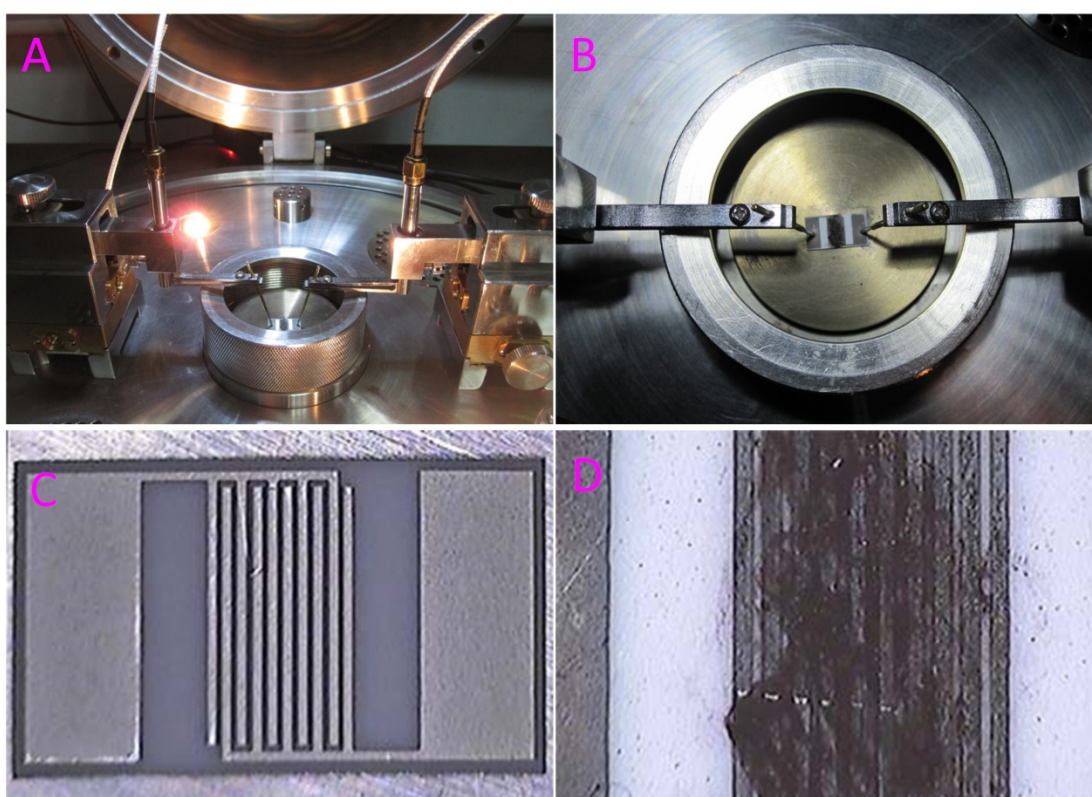

**Fig. S1** Digital photographs of the intelligent gas sensing analysis system (CGS-1TP) used for sensor evaluation in current work. (A) Side view; (B) Top view; (C) The blank interdigital electrode; (D) The interdigital electrode coated with a film containing the synthesized Au NS/ZnO MC heterostructures.

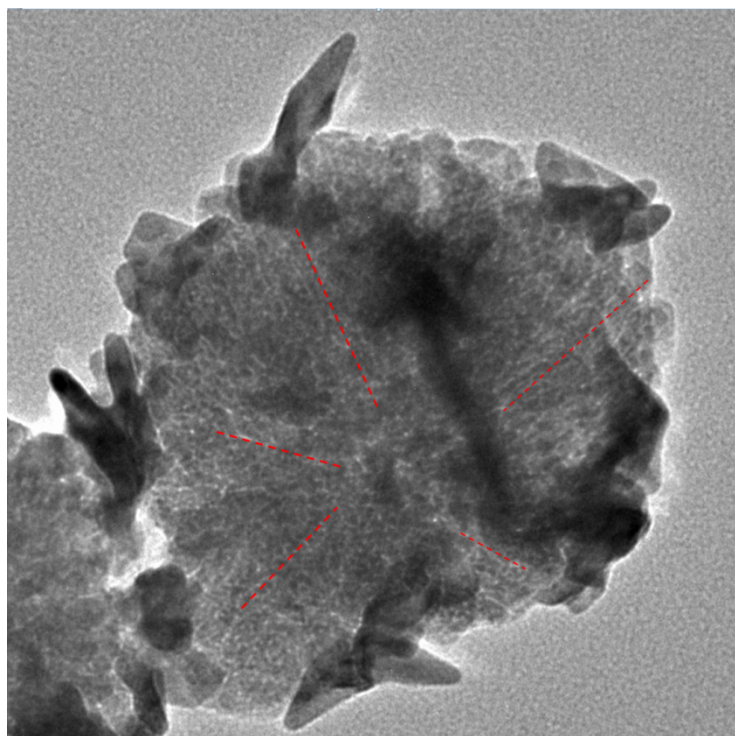

**Fig. S2** The magnified TEM image of a single Au NS/ZnO MC heterostructure. The red dot line indicates the nanochannels consisting of interstitial pores formed by the oriented alignment of ZnO primary nanoparticles.

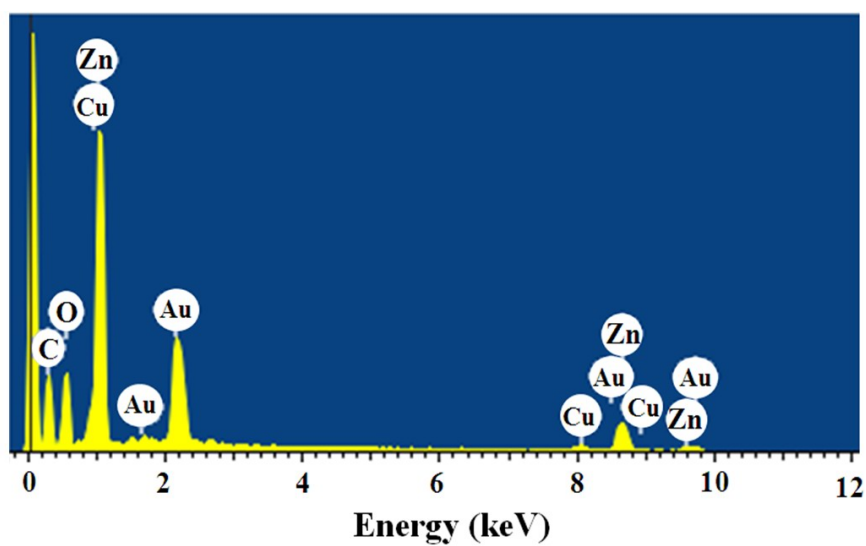

**Fig. S3** EDS spectrum of the Au NS/ZnO MC heterostructures. The Cu and C elements in the spectrum are derived from copper grids and carbon film substrates used in the measurements, respectively.

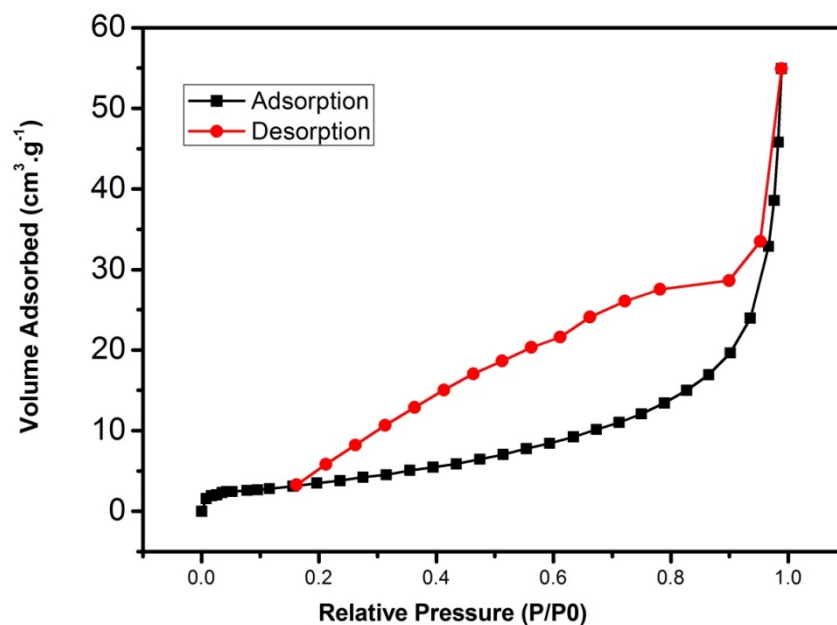

**Fig. S4** The nitrogen adsorption-desorption isotherm curves of the Au NS/ZnO MC heterostructures at 200°C.

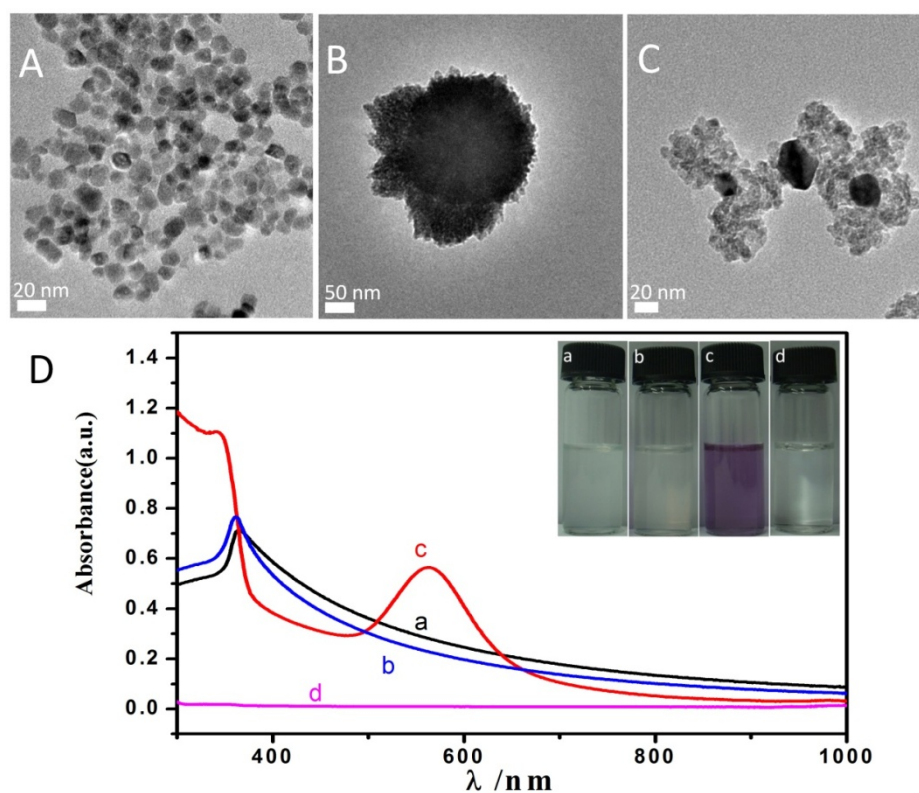

**Fig. S5** TEM images (A-C) and UV-Vis absorption spectrum (D) of the products in control experiments with different reactant compositions: (A) DMF + Zn(AC)<sub>2</sub>; (B) DMF + Zn(AC)<sub>2</sub> + HMTA; (C) DMF + Zn(AC)<sub>2</sub> + HMTA + HAuCl<sub>4</sub>. Inset in (D) is the corresponding digital photographs of the product solutions.

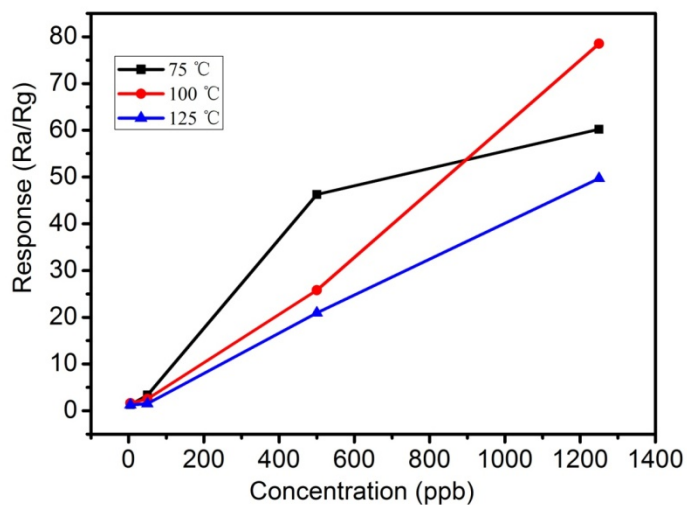

**Fig. S6** Responses curves of the Au NS/ZnO MC sensor towards H<sub>2</sub>S of different concentrations at 75°C, 100°C and 125°C, respectively.

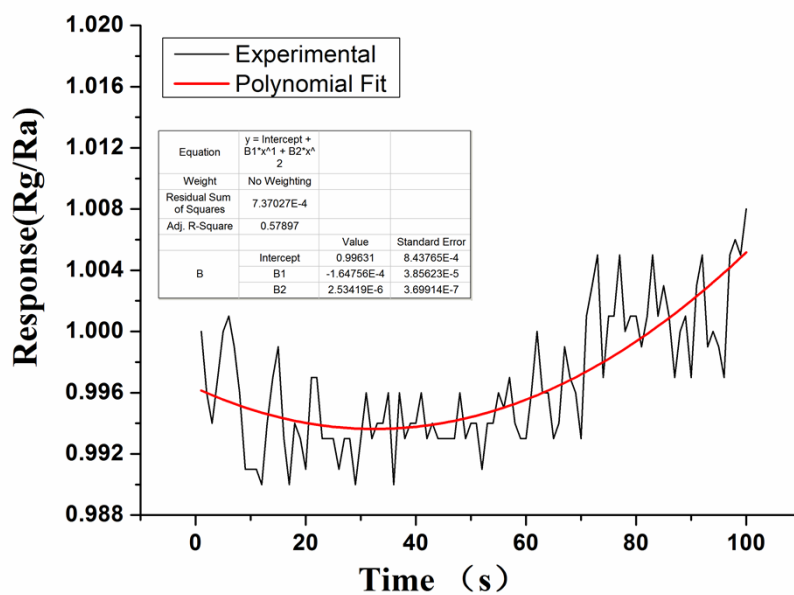

**Fig. S7** The curve with detailed data obtained by polynomial fitting the first 100 response points in the response-time baseline of the Au NS/ZnO MC sensor before the injection of H<sub>2</sub>S. The response values before and after fitting are recorded as R<sub>E</sub> and R<sub>F</sub>, respectively.

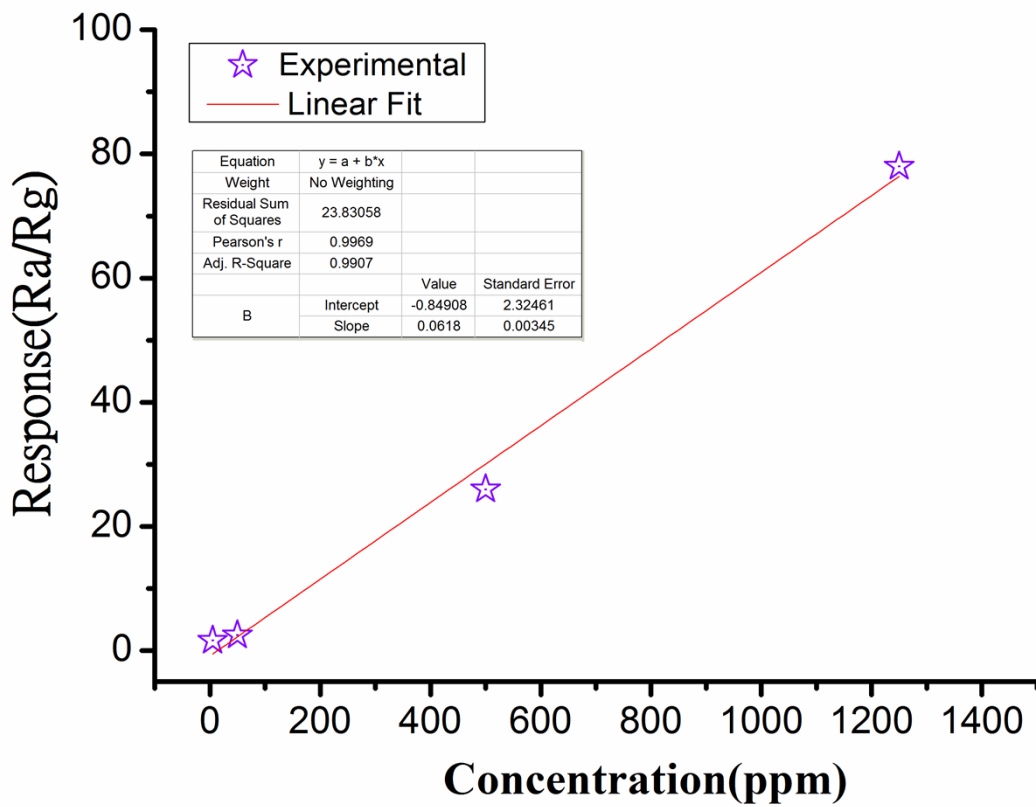

**Fig. S8** The curve with detailed data obtained by linear fitting the response points in the H<sub>2</sub>S sensing measurement of Fig. 6A. The equation is obtained after linear fitting:  $y = -0.84908 + 0.618x$ .

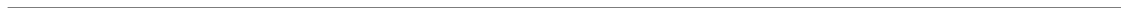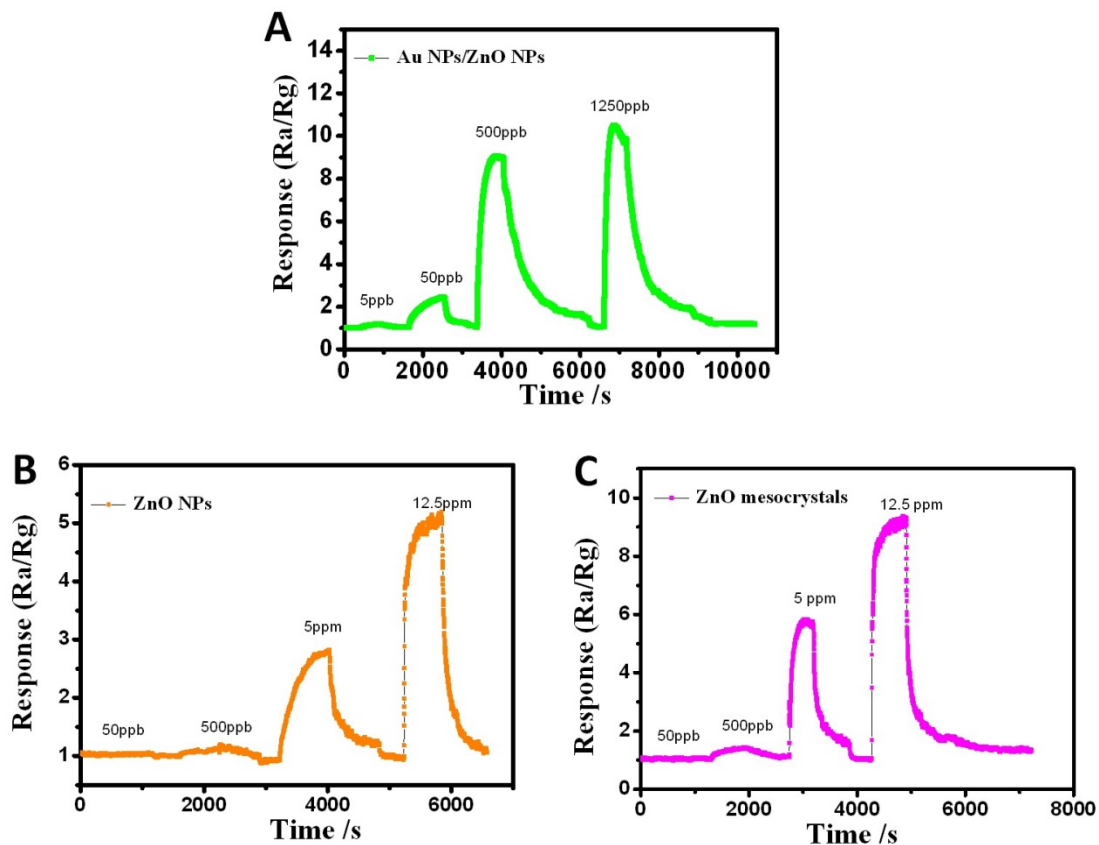

**Fig. S9** Real-time responses of the H<sub>2</sub>S sensors based on the Au NPs/ZnO NPs, ZnO nanoparticles and ZnO mesocrystals, respectively, at different gas concentrations and low working temperature of 100°C.

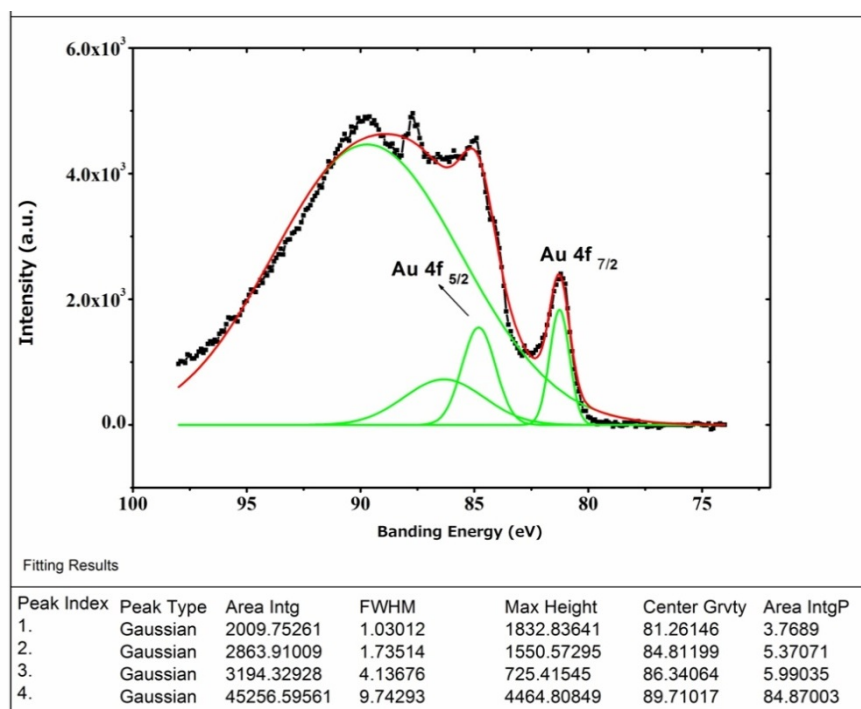

**Fig. S10** XPS analysis of Au element for the Au NS/ZnO MC heterostructures.

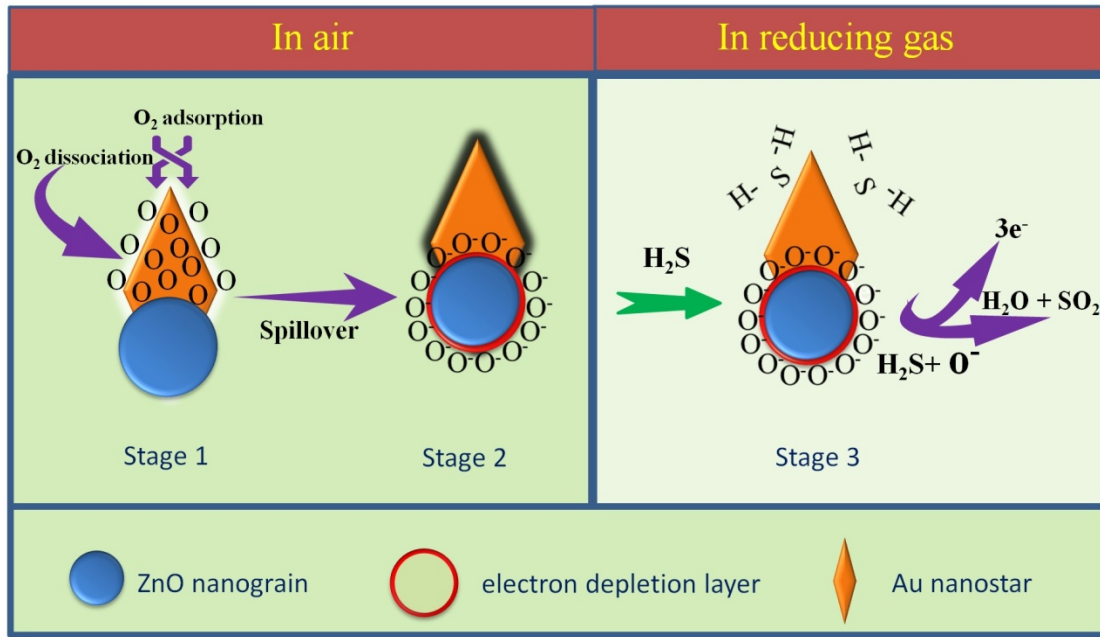

**Fig. S11** Schematic illustration of the catalytic sensing mechanism over the Au NS/ZnO MC heterostructures for enhanced H<sub>2</sub>S sensing performance.

### S1. Calculation for detection limit:

According to the formula (1) below, and  $R_E$  and  $R_F$  obtained by the polynomial fit method in **Fig. S7**,  $V_\chi^2$  can be calculated,

$$V_\chi^2 = \sum (R_F - R_E)^2 \quad (1)$$

$$V_\chi^2 = 0.000736903$$

In terms of the Root mean square (rms), i.e., formula (2), rms can be calculated as follows

$$\text{rms}_{\text{noise}} = \sqrt{(V_\chi^2/N)} \quad (N=100) \quad (2)$$

therefore,  $\text{rms}_{\text{noise}} = 0.0027$ ;

Finally, according to the formula (3) and the value of slope (0.618) obtained from **Fig. S8**, the theoretic detection limit (DL) can be calculated:

$$\begin{aligned} \text{DL(ppb)} &= 3 * (\text{rms}_{\text{noise}} / \text{slope}) \\ &= 3 * (0.0027 / 0.618) = 0.131 \end{aligned} \quad (3)$$

That is, DL(ppb)=0.131

**Tab. S1** Results of control experiments conducted under different compositions in reaction

systems. (For all reaction systems, the concentrations of reactants are the same as the one in typical synthetic protocol)

| Compositions of reaction system |                                                                   | Products                                              |
|---------------------------------|-------------------------------------------------------------------|-------------------------------------------------------|
| a                               | DMF + Zn(Ac) <sub>2</sub>                                         | monodispersed ZnO nanoparticles                       |
| b                               | DMF + Zn(Ac) <sub>2</sub> + HMTA                                  | ZnO mesocrystals comprised of oriented nanograins     |
| c                               | DMF + Zn(Ac) <sub>2</sub> + HMTA + HAuCl <sub>4</sub>             | loose aggregates of ZnO nanograins + Au nanoparticles |
| d                               | DMF + Zn(Ac) <sub>2</sub> + HMTA + Formamide                      | no product                                            |
| e                               | DMF + Zn(Ac) <sub>2</sub> + HMTA + HAuCl <sub>4</sub> + Formamide | The typical Au NS/ZnO MC heterostructures             |

**Tab. S2** Responses of various ZnO-based products towards H<sub>2</sub>S at different concentrations

|                                      |                  |      |     |      |       |
|--------------------------------------|------------------|------|-----|------|-------|
| H <sub>2</sub> S concentration (ppb) |                  | 5    | 50  | 500  | 1250  |
| Response                             | Au NSs/ZnO MCs   | 1.65 | 2.5 | 26   | 78    |
|                                      | Au NPs/ZnO NPs   | 1.2  | 2.5 | 9    | 10.5  |
|                                      |                  |      |     |      |       |
| H <sub>2</sub> S concentration (ppb) |                  | 50   | 500 | 5000 | 12500 |
| Response                             | ZnO mesocrystals | ×    | 1.5 | 5.9  | 9.5   |
|                                      | ZnO NPs          | ×    | 1.3 | 2.8  | 5.2   |

**Tab. S3** Response times of various ZnO-based products towards H<sub>2</sub>S at different concentrations

|                                      |                  |     |     |      |       |
|--------------------------------------|------------------|-----|-----|------|-------|
| H <sub>2</sub> S concentration (ppb) |                  | 5   | 50  | 500  | 1250  |
| Response time (s)                    | Au NSs/ZnO MCs   | 300 | 522 | 450  | 460   |
|                                      | Au NPs/ZnO NPs   | 375 | 688 | 458  | 354   |
|                                      |                  |     |     |      |       |
| H <sub>2</sub> S concentration (ppb) |                  | 50  | 500 | 5000 | 12500 |
| Response time (s)                    | ZnO mesocrystals | ×   | 710 | 360  | 520   |
|                                      | ZnO NPs          | ×   | 730 | 937  | 730   |
